# Supplementary material for: Cysteine Catabolism: A Novel Metabolic Pathway Contributing to Glioblastoma Growth
Source: PubMed Central journal article supplement (PMC5726254; doi:10.1158/0008-5472.can-13-1423), 2013-12-18

**A**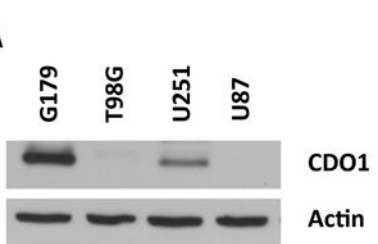**B**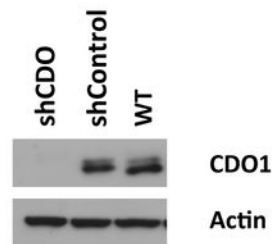

Supplement: NIHMS717877-supplement-Supplementary_Figure_4.pdf [file NIHMS717877-supplement-Supplementary_Figure_4.pdf]
